# Supplementary material for: l-Fucose-containing arabinogalactan-protein in radish leaves
Source: PubMed Central journal article supplement (PMC4610949; doi:10.1016/j.carres.2015.07.002), 2015-10-13
Supplement: mmc1.pdf [file mmc1.pdf]

**Supplementary Information to:**

**L-Fucose-containing arabinogalactan-protein in radish leaves**

Miho Inaba, Takuma Maruyama, Yoshihisa Yoshimi, Toshihisa Kotake, Koji Matsuoka, Tetsuo Koyama, Theodora Tryfona, Paul Dupree, Yoichi Tsumuraya\*

\*Corresponding author

Division of Life Science, Graduate School of Science and Engineering, Saitama University,

255 Shimo-okubo, Sakura-ku, Saitama 338-8570, Japan

E-mail, tsumura@mail.saitama-u.ac.jp, Tel, +81-48-858-3401

**Supplementary Table S1.**

Sugar compositions of oligosaccharide fractions obtained by enzymatic fragmentation of  $\alpha$ -L-Arafase-treated radish leaf AGP by exo- $\beta$ -(1 $\rightarrow$ 3)-galactanase. The analyses were performed by HPAEC-PAD as describe in the section 2.5 in “Experimental”. NN3-3 and AA4 fractions were obtained by digestion of combined N12~N14 and A14~A16 fractions, respectively, by endo- $\beta$ -(1 $\rightarrow$ 6)-galactanase.

| Fraction      | Sugar composition (mole % or molar ratio) |       |     |           |      |
|---------------|-------------------------------------------|-------|-----|-----------|------|
|               | L-Fuc                                     | L-Ara | Gal | 4-Me-GlcA | GlcA |
| N1~N4         | - <sup>a</sup>                            | -     | 100 | -         | -    |
| N5            | 5                                         | 4     | 91  | -         | -    |
| N6            | 5                                         | 4     | 91  | -         | -    |
| N7            | 6                                         | 5     | 89  | -         | -    |
| N8            | 7                                         | 5     | 88  | -         | -    |
| N9            | 6                                         | 5     | 89  | -         | -    |
| N10           | 6                                         | 5     | 89  | -         | -    |
| N11           | 7                                         | 6     | 87  | -         | -    |
| NN3-3         | 1.0                                       | 1.0   | 2.7 | -         | -    |
| A1            | -                                         | -     | 1.0 |           | 1.0  |
| A2-1          | -                                         | -     | 2.0 |           | 1.0  |
| A2-3          | -                                         | -     | 1.0 | 1.0       | -    |
| A3-2          | 1.0                                       | -     | 1.8 |           | 1.0  |
| A3-3          | -                                         | -     | 2.1 | 1.0       | -    |
| A4-3          | -                                         | -     | 3.3 | 1.0       | -    |
| A4-4          | 1.2                                       | -     | 2.2 | 1.0       | -    |
| A5-3          | -                                         | -     | 4.4 | 1.0       | -    |
| A6            | 6                                         | 5     | 72  | 14        | 3    |
| A7            | 5                                         | 5     | 75  | 13        | 2    |
| A8            | 5                                         | 5     | 77  | 11        | 2    |
| A9            | 5                                         | 5     | 78  | 10        | 2    |
| A10           | 5                                         | 6     | 78  | 9         | 2    |
| A11           | 6                                         | 6     | 78  | 8         | 2    |
| A12           | 6                                         | 6     | 78  | 8         | 2    |
| A13           | 10                                        | 9     | 66  | 11        | 4    |
| AA4           | 1.0                                       | 1.0   | 3.0 | 1.0       | -    |
| Middle- $M_r$ | 14                                        | 14    | 64  | 6         | 2    |
| High- $M_r$   | 14                                        | 18    | 57  | 9         | 2    |

<sup>a</sup> Not detected.

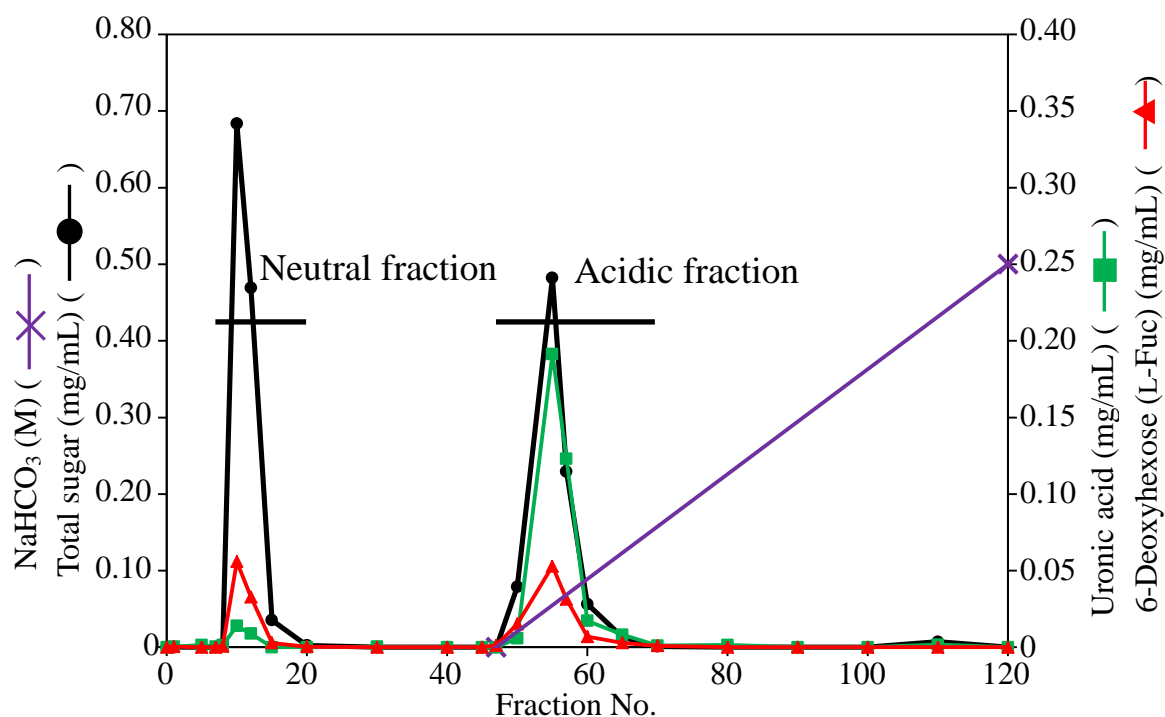

**Supplementary Figure S1.**

Separation by DEAE-cellulose column chromatography of neutral and acidic sugars in the low- $M_r$  fraction obtained by digestion of  $\alpha$ -L-Arafase-treated radish leaf AGP with exo- $\beta$ -(1 $\rightarrow$ 3)-galactanase. The chromatography was performed as described in the section 2.4 in “Experimental”. The *bars* indicate the fractions pooled.

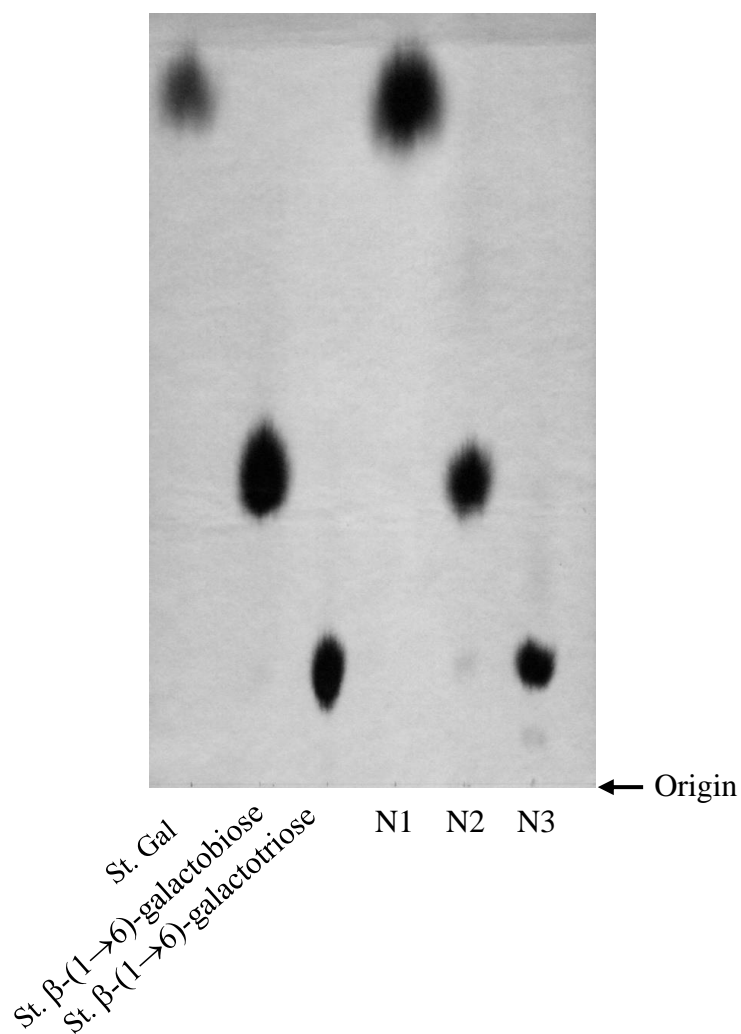

**Supplementary Figure S2.**

Paper chromatographic separation of N1~N3 fractions obtained by enzymatic fragmentation of  $\alpha$ -L-Arafase-treated radish leaf AGP with exo- $\beta$ -(1 $\rightarrow$ 3)-galactanase. The chromatography was performed with solvent A as described in the section 2.2 in “Experimental”. St. means standard sugar.

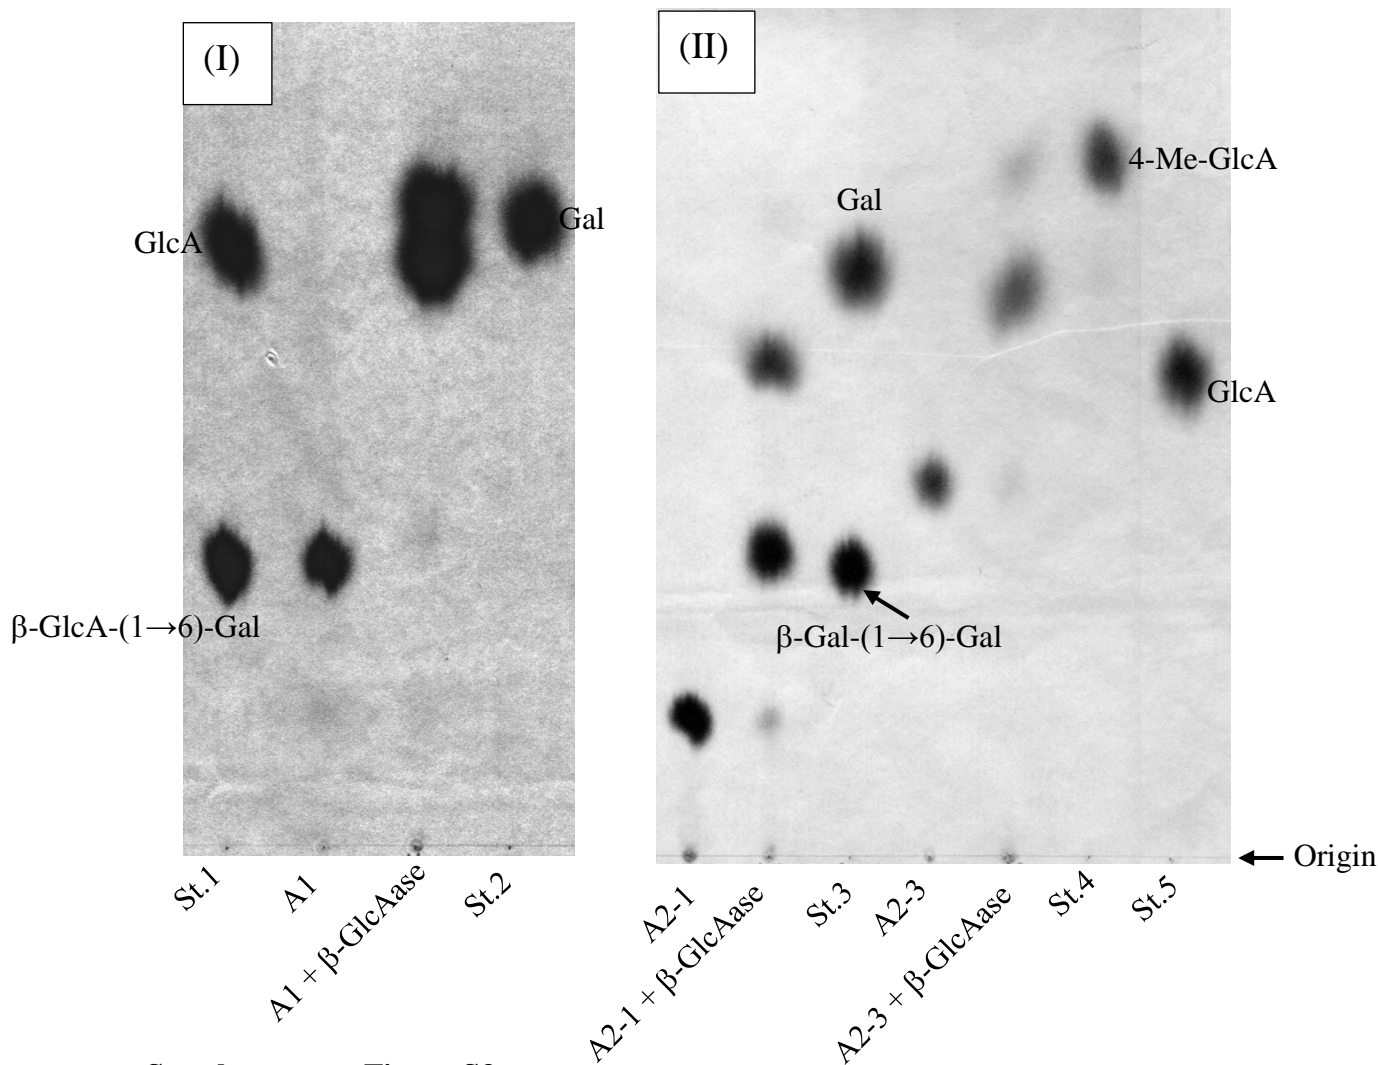

**Supplementary Figure S3.**

Paper chromatographic separation of A1 (panel I), and A2-1 and A2-3 (panel II) obtained by enzymatic fragmentation of  $\alpha$ -L-Arafase-treated radish leaf AGP with exo- $\beta$ -(1 $\rightarrow$ 3)-galactanase. The chromatography was performed with solvent B as described in the section 2.2 in “Experimental”. The oligosaccharides were analyzed for their sugar compositions by digestion with  $\beta$ -GlcAase as described in the section 2.5.
